# Supplementary material for: Alleviating the Mental Health Burden of Structural Discrimination and Hate Crimes: The Role of Psychiatrists
Source: Atypon-hosted journal article supplement (doi:10.1176/appi.ajp.2018.17080891), 2018-10-01
Supplement: appi.ajp.2018.17080891.ds001.pdf [file appi.ajp.2018.17080891.ds001.pdf]

## **SUPPLEMENTAL APPENDIX A: Structural Racism/Discrimination Literature Review**

To determine the extent to which structural racism is discussed in the literature as it pertains to psychiatry and mental health, PubMed was searched using combinations of the following key words: (“psychiatry” OR “mental health”) AND (“structural racism,” OR “structural discrimination,” OR “structural stigma,” OR “institutional racism,” OR “institutional discrimination,” OR “institutional stigma.”) All articles were uploaded into EndNote software. All duplicate articles were identified via the program, and then sorted alphabetically by title to identify any missed articles. Two authors (NR and TM) reviewed all articles titles and abstracts to determine if they met the following inclusion criteria: English language, mentioned “psychiatry” or “mental health,” and addressed a minority population (defined as a racial, ethnic, religious, immigrant, or sexual minority). Since we were interested in the intersection between psychiatry and minority status, studies were excluded if the population of focus was people with mental illness as a whole. We excluded 23 articles in which mental illness stigma/discrimination was the primary focus; these articles either did not mention or only briefly mentioned racial/ethnic or other minorities. To ensure complete data, the search strategy was supplemented with manual searches of the references cited in articles meeting inclusion criteria.

*Data extraction:* A data extraction spreadsheet was designed and employed to systematically extract data from studies. The following data was collected from all articles meeting inclusion criteria: academic journal in which articles were published, most recent journal impact factor (2014-2016), year of publication, country (U.S. vs international), whether the study included a systemic solution (described or proposed an evidence-based solution to potentially help alleviate the structural racism reported on in the manuscript), primary field of journal focus (e.g., Medicine, Social Sciences, Psychology, Arts and Humanities) and minority population focus (e.g., race, religion, sexual orientation). Two authors (TM and NR) independently extracted data from the included studies. To ensure quality of data extraction, the spreadsheets of the coding authors (TM and NR) were examined for discrepancies. In the event of a discrepancy between the two coding authors, discrepancies were discussed until consensus was reached.

*Data Analysis:* Descriptive statistics were used to categorize the proportion of minority populations of focus and manuscripts published in the U.S. vs abroad. We also used descriptive statistics to describe the mean and range of impact factors and the range in publication year.

**RESULTS:** The initial search resulted in 55 articles, of which 49.1% (27/55) met inclusion criteria. Notably, 82% (23/28) of excluded articles focused on stigmatization because of mental illness. Of the articles meeting inclusion criteria, almost 30% (8/27) originated outside of the U.S., with the predominant international sources being Germany and the United Kingdom (**Table 1**). The reviewed literature spanned nearly five decades, with the majority (67%; 18/27) published in the 2010s. The mean impact factor of the journals for all included manuscripts was 3.43 (range 0.08-19.97), with only three articles (25, 27, 38) published in journals with impact factors >4.2. The journals in which the papers were published were disproportionately public health and social science of medicine journals. Only 18.5% (5/27) of the manuscripts were published by physicians. The majority focused on racial/ethnic minorities (63%, 17/27). Only 18.5% (5/27) offered a systemic solution to the problem identified. The systemic solutions included the employment of more racial minorities in the field of mental health (24), and development of a task force of racial/ethnic minority providers who would be responsible for identifying discriminatory practices (25). Many solutions emphasized the need to acknowledge potentially negative attitudes by providers that are directed toward minority populations, and that these negative attitudes could negatively impact treatment as well as these minority populations' willingness to access and accept care. Some studies emphasized the importance of having members of these minority populations provide care to their community, and the need to empower providers with the responsibility of identifying and dismantling practices determined to be prejudiced and unfair.

**TABLE S1. Systematic review on structural racism and mental health**

| Reference             | Journal                                      | SCOPUS Journal Focus                   | Impact Factor | Year | U.S./ Non-U.S. | Systemic Solution                                                                                          | Minority Group (Racial, religious, immigrant, sexual orientation) | Specific Minority Description   |
|-----------------------|----------------------------------------------|----------------------------------------|---------------|------|----------------|------------------------------------------------------------------------------------------------------------|-------------------------------------------------------------------|---------------------------------|
| Sabshin, et al. (25)  | American Journal of Psychiatry               | Medicine: Psychiatry and Mental Health | 12.295        | 1970 | U.S.           | task force of minority psychiatrists to point out racist practices                                         | Racial                                                            | Black                           |
| Ellis, et al. (30)    | Journal of the National Medical Association  | Medicine                               | 1.067         | 1975 | U.S.           | recruit better qualified black students, develop system of trained professionals to support black students | Racial                                                            | Black                           |
| Morales, et al. (42)  | Social Casework                              | Medicine                               | N/A           | 1978 | U.S.           | None Described                                                                                             | Racial                                                            | Black, Hispanic/Latino          |
| Swartz, L. (46)       | Culture, Medicine and Psychiatry             | Social Sciences: Anthropology          | 1.288         | 1991 | Non-U.S.       | None Described                                                                                             | Racial                                                            | Black                           |
| Wade, J. (48)         | American Journal of Orthopsychiatry          | Psychology: Psychology (Misc.)         | 1.364         | 1993 | U.S.           | more racial minorities employed in mental health                                                           | Racial                                                            | General, unspecified            |
| Fox, et al. (31)      | Culture, Medicine and Psychiatry             | Social Sciences: Anthropology          | 1.288         | 1999 | U.S.           | None Described                                                                                             | Racial                                                            | Black                           |
| Hancock, C. (35)      | Nursing Standard                             | Medicine                               | 0.08          | 1999 | Non- U.S.      | None Described                                                                                             | Racial                                                            | General, unspecified            |
| Green, et al. (33)    | Journal of Health Services Research & Policy | Medicine: Health Policy                | 1.786         | 2002 | Non- U.S.      | None Described                                                                                             | Racial/Immigrant                                                  | Asian (Chinese)                 |
| McKenzie, et al. (38) | BMJ                                          | Medicine                               | 19.967        | 2007 | Non- U.S.      | None Described                                                                                             | Racial                                                            | Black and Minority Ethnic (BME) |
| Bennewith, et al (27) | The British Journal of Psychiatry            | Medicine: Psychiatry and Mental Health | 7.06          | 2010 | Non- U.S.      | None Described                                                                                             | Racial                                                            | Black and Minority Ethnic (BME) |

|                             |                                          |                                                                |       |      |      |                                                                          |                    |                                 |
|-----------------------------|------------------------------------------|----------------------------------------------------------------|-------|------|------|--------------------------------------------------------------------------|--------------------|---------------------------------|
| Hatzenbuehler, et al (37)   | American Journal of Public Health        | Medicine: Public Health, Environmental and Occupational Health | 4.138 | 2010 | U.S. | None Described                                                           | Sexual Orientation | Lesbian, Gay, Bisexual (LGB)    |
| Mendez, et al. (39)         | Stress and Health                        | Medicine                                                       | 1.926 | 2013 | U.S. | None Described                                                           | Racial             | Black, Hispanic/Latino          |
| Williams, et al. (50)       | American Behavioral Scientist            | Social Sciences: Cultural Studies                              | 1.766 | 2013 | U.S. | None Described                                                           | Racial             | General, unspecified            |
| Williams, et al. (49)       | American Behavioral Scientist            | Social Sciences: Cultural Studies                              | 1.766 | 2013 | U.S. | Person-focused care, on-site attorneys, increased access to primary care | Racial             | General, unspecified            |
| Acevedo-Garcia, et al. (26) | American Journal of Public Health        | Medicine: Public Health, Environmental and Occupational Health | 4.138 | 2013 | U.S. | None Described                                                           | Racial             | Black, Hispanic/Latino          |
| Metzl, et al. (41)          | Virtual Mentor                           | Medicine                                                       | 0.33  | 2014 | U.S. | None Described                                                           | Racial             | Black, General                  |
| Yang, et al. (51)           | Social Science & Medicine                | Social Sciences: Health (Social Science)                       | 2.814 | 2014 | U.S. | None Described                                                           | Immigrant          | Chinese                         |
| Cheng, et al. (28)          | Journal of Immigrant and Minority Health | Medicine: Public Health, Environmental and Occupational Health | 1.579 | 2015 | U.S. | None Described                                                           | Immigrant          | Chinese                         |
| Oldenburg, et al. (43)      | AIDS (London)                            | Medicine: Infectious Diseases                                  | 3.81  | 2015 | U.S. | None Described                                                           | Sexual Orientation | Men who have Sex with Men (MSM) |

|                         |                                                   |                                                                |       |      |           |                                                                                    |                    |                                                                   |
|-------------------------|---------------------------------------------------|----------------------------------------------------------------|-------|------|-----------|------------------------------------------------------------------------------------|--------------------|-------------------------------------------------------------------|
| Friedman, et al. (32)   | International Journal of Drug Policy              | Medicine: Health Policy                                        | 3.191 | 2016 | U.S.      | None Described                                                                     | Racial             | Black                                                             |
| Earnshaw, et al. (29)   | Journal of Health Psychology                      | Psychology: Applied Psychology                                 | 1.882 | 2016 | U.S.      | None Described                                                                     | Racial             | Black, Hispanic/Latino                                            |
| Thackwell, et al. (47)  | BMC International Health and Human Rights         | Medicine: Public Health, Environmental and Occupational Health | 1.6   | 2016 | Non- U.S. | None Described                                                                     | Racial             | Black                                                             |
| Hatzenbuehler, M. (36)  | Journal of Clinical Child & Adolescent Psychology | Psychology: Developmental and Educational Psychology           | 4.027 | 2016 | U.S.      | Describes future approaches that can be taken to reduce stigma for this population | Sexual Orientation | Lesbian, Gay, Bisexual (LGB)                                      |
| Pachankis, et al. (44)  | Annals of Behavioral Medicine                     | Psychology                                                     | 4.2   | 2016 | U.S.      | None Described                                                                     | Sexual Orientation | Lesbian, Gay, Bisexual (LGB)                                      |
| Pachankis, et al. (45)  | Archives of Sexual Behavior                       | Arts and Humanities: Arts and Humanities (miscellaneous)       | 2.783 | 2016 | Non- U.S. | None Described                                                                     | Sexual Orientation | Men who have Sex with Men (MSM)                                   |
| Metzl, et al. (40)      | Academic Medicine                                 | Social Sciences: Education                                     | 4.194 | 2017 | U.S.      | None Described                                                                     | Racial             | General, unspecified                                              |
| Gustafsson, et al. (34) | International Journal for Equity in Health        | Medicine: Health Policy                                        | 2.378 | 2017 | Non- U.S. | None Described                                                                     | Sexual Orientation | Lesbian, Gay, Bisexual, Transgendered, Queer/ Questioning (LGBTQ) |
